# Supplementary material
Source: PubMed Central journal article supplement (PMC4199085)
Supplement: NIHMS434624-supplement-Supporting_Information.pdf [file NIHMS434624-supplement-Supporting_Information.pdf]

## Supporting Information

Figures S-1 and S-2 show details regarding the transverse and longitudinal relaxivities of *MBICs* and *MBICclusters* as a function of hydrodynamic size. This material is available free of charge via the Internet at <http://pubs.acs.org>.

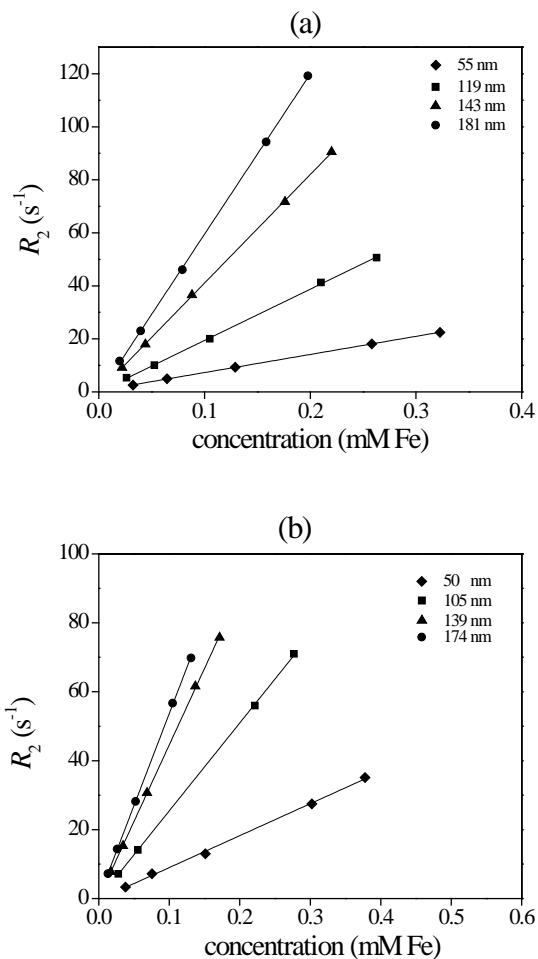

**Figure S-1.** Transverse relaxation rates of *MBICs* and *MBICclusters* with different intensity average diameters with a) 3.5K-6.8K H<sub>2</sub>N-PEO-PAA, and b) 3.5K-9.5K H<sub>2</sub>N-PEO-PAA as a function of iron concentration. Non-crosslinked *MBICs* are represented by the smallest of the average particle diameters in each case.

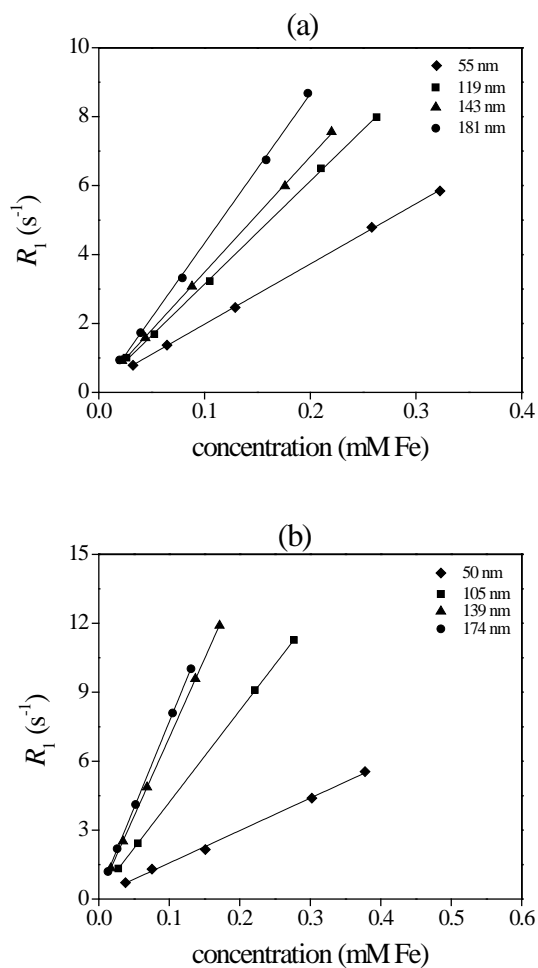

**Figure S-2.** Longitudinal relaxation rates of MBICs and *MBIClusters* with different intensity average diameters with a) 3.5K-6.8K H<sub>2</sub>N-PEO-PAA, and b) 3.5K-9.5K H<sub>2</sub>N-PEO-PAA as a function of iron concentration. Non-crosslinked MBICs are represented by the smallest of the average particle diameters in each case.

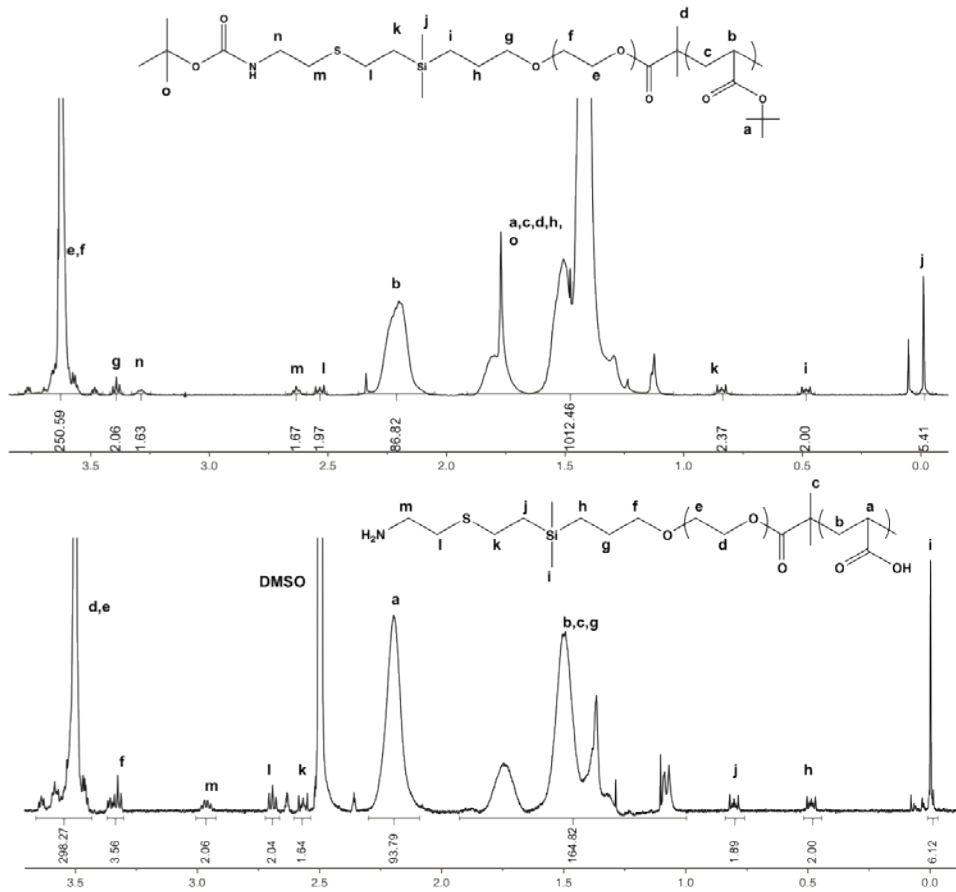

**Figure S-3.**  $^1\text{H}$  NMR spectrum of *tboc*-NH-PEO-*b*-PtBA in  $\text{CDCl}_3$  (top) and  $\text{H}_2\text{N}$ -PEO-*b*-PAA in  $\text{D}_6\text{-DMSO}$  (bottom)

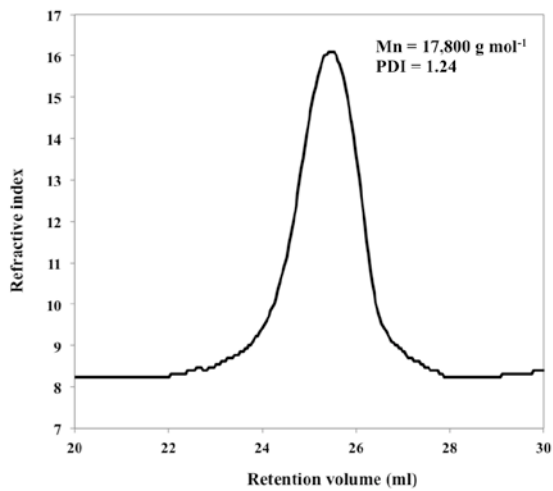

**Figure S-4.** SEC analysis of *tboc*-NH-PEO-*b*-PtBA

**Corresponding Author**

\*Judy Riffle, [jriffle@vt.edu](mailto:jriffle@vt.edu) or judyriffle@aol.com
